# Supplementary material for: Analysis of shear creep behaviors of hardwood and softwood using creep recovery curves
Source: Research Square preprint supplement (doi:10.21203/rs.3.rs-5793217/v1), 2025-01-13
Supplement: Supplementary file 1 [file d041480a79a4a268b89f612e.xlsx]

## Sheet: Japanese cypress
Analysis of shear creep behaviors of hardwood and softwood using creep recovery curves, Wood science and Technology, Shimazaki et al.,nagoya university, musica@agr.nagoya-u.ac.jp
							Burger model / Modified Burger model			Burger model		Modified Burger model
Specimen number	Average annual ring width (mm)	density[kg/m3]	MC[%]	ν(Poisson's ratio at t=0)	γp(8)/γd(8)	B in Eq.7	E1[Pa]	E2[Pa]	η1[Pa・h]	η2[Pa・h]	R2	K	n	R2
H1-3	5.5	439.368	9.43564	-0.253073	1.3919	0.0076072	1.07767	9.5152	6.0409	41.262	0.872709	0.073942	0.36724	0.99171
H2-1	5	441.335	9.12671	-0.0316749	2.41452	0.06081	0.979935	12.153	10.752	30.167	0.421236	0.065988	0.40288	0.97346
H2-3	5	406.835	9.06402	-0.129908	1.37043	0.083742	0.955678	9.5247	7.1968	37.438	0.372639	0.10976	0.45899	0.92822
H2-5	3.5	431.818	9.48382	-0.129719	1.2689	0.071564	1.22413	14.99	16.528	66.493	0.554077	0.11011	0.42711	0.94041
H3-2	4.5	418.064	9.09001	-0.238409	1.19818	0.075141	0.724162	5.2881	3.3859	24.95	0.494406	0.07748	0.43548	0.94454
H3-3	4.5	433.761	9.30434	-0.0149899	1.42375	0.023721	1.03153	9.2873	7.8422	42.228	0.774672	0.043339	0.32662	0.97352
H4-2	3.25	432.7	8.95165	0.245095	5.01569	0.08803	0.910073	20.018	51.249	23.152	-0.0641978	0.039011	0.3725	0.33048
H4-3	2.25	433.784	8.98943	-0.098659	0.857345	0.046031	0.912015	8.4762	7.4625	55.519	0.786797	0.069492	0.37639	0.98968
H4-4	2.25	455.347	9.30983	-0.531693	1.12052	0.092381	0.785467	7.7237	8.349	41.411	0.429553	0.14405	0.48697	0.84575
H5-2	1.2	473.713	9.30096	-0.227581	1.03797	0.061301	0.909913	7.6326	6.3837	42.755	0.702203	0.07776	0.40538	0.98831
H5-3	1.66667	491.82	9.24759	0.0160269	1.67612	0.0028677	0.949518	7.3571	3.8737	28.733	0.91114	0.079769	0.37955	0.99295
H5-4	1.5	472.042	8.87917	-0.0496618	1.37742	0.037331	0.786386	6.1409	4.4669	25.356	0.72784	0.064137	0.39299	0.98882
H6-2	1.125	477.831	9.39673	0.221136	2.03684	0.046654	1.1709	10.948	5.651	33.156	0.543034	0.057283	0.37696	0.98357
H6-4	1.1	490.504	9.28107	0.0207329	1.03007	0.027988	1.007	8.5763	7.5754	51.459	0.827358	0.052242	0.34087	0.98507
H6-5	2.25	484.637	9.35118	0.109458	0.709584	0.00968	0.968699	8.5262	6.0212	67.493	0.907466	0.078512	0.36007	0.99138
H7-1	2.75	437.284	9.8013	-0.250045	2.80518	0.0011469	0.866858	9.6393	3.1361	24.702	0.946771	0.088152	0.3804	0.99435
H7-2	2.25	391.135	9.31863	0.106164	1.04313	0.015468	0.780567	5.1487	4.0206	30.76	0.864665	0.040571	0.32615	0.98699
H7-4	2.5	438.759	9.80004	-0.263821	1.17689	0.078644	0.844574	9.4582	11.184	45.149	0.543436	0.10738	0.44525	0.93965
H8-1	2.5	438.7	10.0033	0.150092	0.982595	0.073095	0.992656	7.8221	11.465	44.663	0.671071	0.097114	0.43186	0.97394
H8-3	1.75	451.248	9.29208	0.136463	1.44181	0.026918	1.23665	12.39	10.653	52.264	0.784422	0.05232	0.33967	0.98596
H9-5	1.5	461.356	9.28681	0.132238	0.951089	0.015609	1.10591	8.7234	9.0306	55.277	0.832257	0.048125	0.32738	0.9773
AVE	2.75437	447.716	9.31973	-0.0515156	1.53952	0.0450348	0.962871	9.49233	9.63179	41.1613	0.662074	0.0750732	0.388605	0.938384
SD	1.35951	26.3404	0.274338	0.191541	0.922774	0.0299684	0.140146	3.26439	9.83807	13.0402	0.237602	0.0265027	0.0447333	0.140033

## Sheet: Japanese beech
Analysis of shear creep behaviors of hardwood and softwood using creep recovery curves, Wood science and Technology, Shimazaki et al.,nagoya university, musica@agr.nagoya-u.ac.jp
							Burger model / Modified Burger model			Burger model		Modified Burger model
Specimen number	Average annual ring width (mm)	density[kg/m3]	MC[%]	ν(Poisson's ratio at t=0)	γp(8)/γd(8)	B in Eq.7	E1[Pa]	E2[Pa]	η1[Pa・h]	η2[Pa・h]	R2	K	n	R2
B2	1.5	704.16	8.74121	0.417457	1.50117	0.0011197	3.06116	15.534	4.1942	67.739	0.961107	0.041138	0.22723	0.994152
B3	2	751.085	8.68571	0.296457	0.439789	0.0027127	1.053	4.1395	2.3049	61.695	0.956107	0.056511	0.2789	0.931061
B4	1.66667	717.832	8.94143	0.320395	0.296792	0.0029291	1.3368	5.5072	3.5824	121.99	0.918076	0.064762	0.2762	0.878711
B7	1.66667	750.643	8.6804	0.288745	0.292352	0.024431	1.0103	4.1839	2.4306	79.311	0.90525	0.084794	0.33739	0.869795
B10	2	742.507	8.74888	0.19003	0.357465	0.014206	0.918223	3.8515	2.2367	51.426	0.931174	0.069009	0.32879	0.9106
B11	2	738.661	8.7162	0.26431	0.899738	0.0011732	1.07753	5.729	2.0652	44.799	0.961944	0.037211	0.2304	0.966567
B12	1.5	689.026	8.66992	0.207646	0.185842	0.032882	0.906864	3.6773	2.3663	128.39	0.894237	0.1152	0.35755	0.852319
B13	2.33333	724.406	8.60633	0.255829	0.724179	0.0027127	1.18493	6.2777	3.0392	54.828	0.951818	0.059471	0.29651	0.959803
B14	2.25	739.169	8.72549	0.2188	0.584116	0.0024619	0.89766	3.7099	1.8006	39.547	0.966223	0.060323	0.297	0.955089
B15	2	744.126	8.65729	0.287717	0.387675	0.0017657	1.16497	4.6607	1.3307	88.915	0.876721	94.191	1.0061	0.87678
B16	3	700.555	8.47906	0.331559	0.662668	0.0012119	1.4485	8.8848	5.548	82.48	0.96535	0.044945	0.23741	0.956106
B17	3.25	631.123	8.64003	0.319079	0.588671	0.011574	1.31399	7.5352	3.6047	76.224	0.916151	0.12512	0.37444	0.943884
B18	2	734.731	8.71757	0.250841	0.233282	0.080831	1.03854	4.0731	3.0574	104.46	0.87278	0.22265	0.45397	0.846969
BS4	1.83333	768.459	8.48278	0.259448	0.438932	0.0011208	1.13741	5.5611	2.4772	80.517	0.948249	0.047976	0.23896	0.918885
BS10	1.125	681.084	8.6839	0.44886	0.777473	-0.0033191	0.90476	3.6787	1.5501	28.794	0.779721	0.07108	0.37098	0.909321
AVE	2.00833	721.171	8.67841	0.290478	0.558009	0.0118542	1.23031	5.80024	2.77255	74.0743	0.920327	6.35275	0.354122	0.918003
SD	0.532334	33.9416	0.106004	0.0688783	0.324019	0.0207983	0.515852	2.99415	1.06827	27.9405	0.0486898	23.4758	0.184983	0.0436886
